# Supplementary material
Source: Springer Nature journal article supplement (https://www.springermedizin.de/resource/supplementary/12881_2008_434_MOESM5_ESM.pdf/9450646)

Position of previously associated SNPs

Rai-3'd1  
Rai-3'd3  
Rai-3'7

rs numbers

rs74915  
rs10853773

rs1799787  
rs238417  
rs238416  
rs238415

rs171140  
rs238403  
rs238404  
rs1799793  
rs238405  
rs238406  
rs238407  
rs1618536  
rs1799783  
rs3810366  
rs11878644

rs735482  
rs2336219  
rs3212986  
rs3212965  
rs3212964  
rs3212961

C C

GCCG

ACTCAGACTGT

AGCCAA

Chimp  
allele

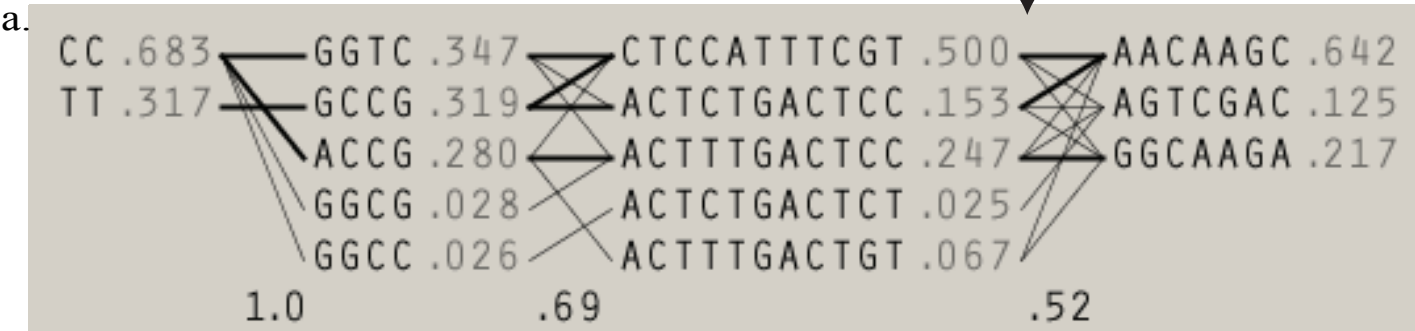

CEU

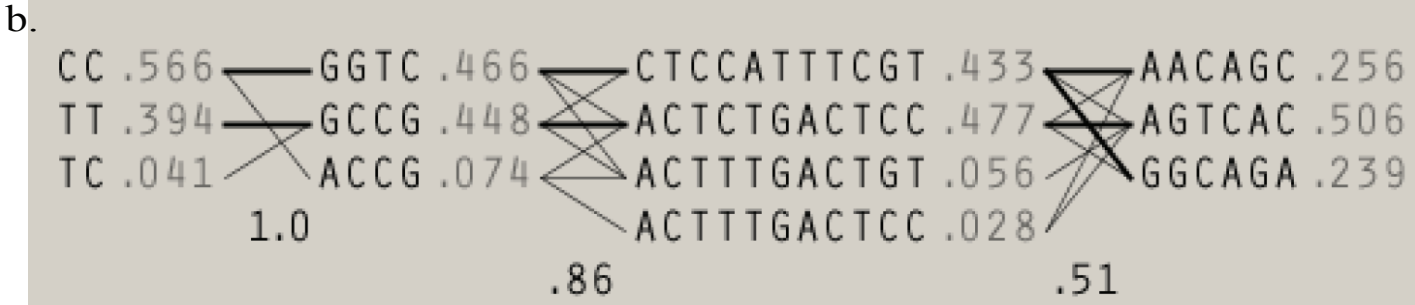

HCB/  
JPT

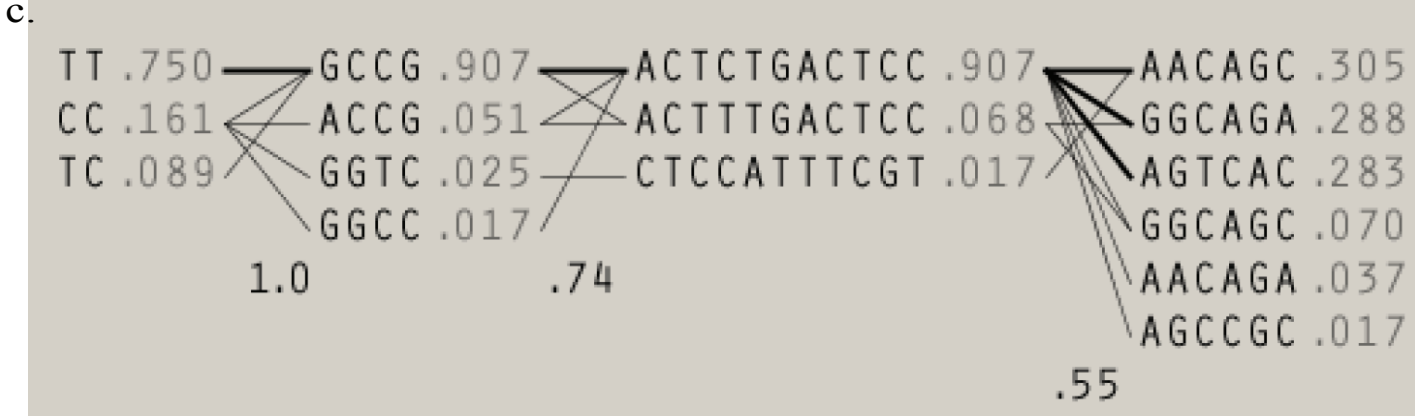

YRI

d.

Breast cancer cohort

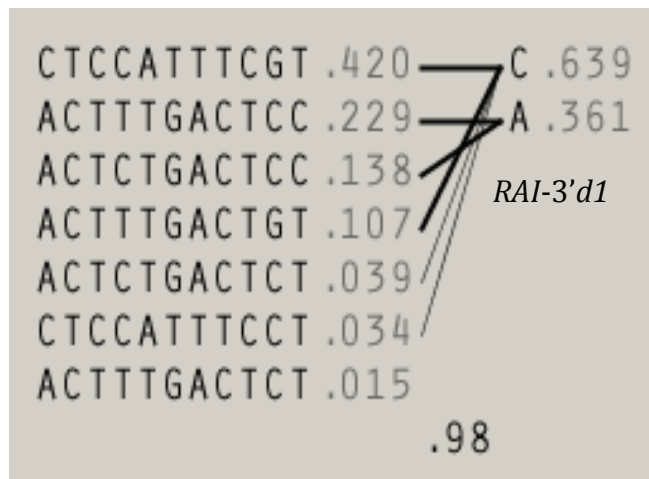

Supplement: MOESM5 [file 9450646]
